# Supplementary material
Source: publisher figshare collection journal article supplement (https://aacr.figshare.com/articles/dataset/_/22674930)
Supplement: Supplementary file 1 [file 40244727]

**Supplementary-Table-3. Framework for the evaluation of global respiratory muscles and diaphragm function** (adapted from (1,2)).

|                                                                                                                                                                                                                                                                                                                                                                                                                                                                                                                                                                                                                                                                                                                                                                                                                                                                                                                                                                                                                                                                                                                                                                                                                                                                                                                                                                                                                                                                         |
|-------------------------------------------------------------------------------------------------------------------------------------------------------------------------------------------------------------------------------------------------------------------------------------------------------------------------------------------------------------------------------------------------------------------------------------------------------------------------------------------------------------------------------------------------------------------------------------------------------------------------------------------------------------------------------------------------------------------------------------------------------------------------------------------------------------------------------------------------------------------------------------------------------------------------------------------------------------------------------------------------------------------------------------------------------------------------------------------------------------------------------------------------------------------------------------------------------------------------------------------------------------------------------------------------------------------------------------------------------------------------------------------------------------------------------------------------------------------------|
| <b>A. List of respiratory muscle variables assessed</b>                                                                                                                                                                                                                                                                                                                                                                                                                                                                                                                                                                                                                                                                                                                                                                                                                                                                                                                                                                                                                                                                                                                                                                                                                                                                                                                                                                                                                 |
| <ol style="list-style-type: none"> <li>1. abdominal paradox on clinical examination (sitting or supine)</li> <li>2. restrictive ventilatory defect on pulmonary function tests (PFT), defined as a vital capacity (VC) below 80% of normal predicted value (NPV) with normal forced expiratory volume in 1 second /VC ratio or a total lung capacity below 80% of NPV</li> <li>3. VC drop above 15% in the supine position</li> <li>4. maximal inspiratory pressure (MIP) and sniff nasal inspiratory pressure (SNIP) both lower than 80% of NPV</li> <li>5. esophageal pressure drop in response to bilateral phrenic nerve stimulation below 11 cmH<sub>2</sub>O</li> <li>6. amplitude of diaphragm electromyographic motor responses to electric phrenic stimulation (M-waves) below 250 mV (micro-voltage), bilaterally</li> <li>7. reduced diaphragm thickening fraction or excursion on ultrasound examination, bilaterally</li> <li>8. reduced diaphragm excursion on dynamic magnetic resonance imaging, bilaterally</li> <li>9. clustered episodes of hemoglobin desaturation and/or hypercapnia on nocturnal oximetry/capnography</li> <li>10. hypercapnia (PaCO<sub>2</sub> ≥ 45mmHg) on arterial blood gases during unassisted breathing, in the absence of evident central hypoventilation and of obstructive ventilatory defect on PFT</li> <li>11. presence of myositis/necrotic figures on diaphragm histopathologic description at autopsy.</li> </ol> |
| <b>B. Diagnosis of global respiratory muscle involvement</b>                                                                                                                                                                                                                                                                                                                                                                                                                                                                                                                                                                                                                                                                                                                                                                                                                                                                                                                                                                                                                                                                                                                                                                                                                                                                                                                                                                                                            |
| <b>B.1. Certain</b>                                                                                                                                                                                                                                                                                                                                                                                                                                                                                                                                                                                                                                                                                                                                                                                                                                                                                                                                                                                                                                                                                                                                                                                                                                                                                                                                                                                                                                                     |
| B.1.1. Restrictive ventilatory defect AND concomitantly low MIP+SNIP                                                                                                                                                                                                                                                                                                                                                                                                                                                                                                                                                                                                                                                                                                                                                                                                                                                                                                                                                                                                                                                                                                                                                                                                                                                                                                                                                                                                    |
| B.1.2. <i>In the absence of either MIP or SNIP (technical issue or patient's inability to perform):</i> restrictive ventilatory defect AND low MIP or low SNIP AND hypercapnia                                                                                                                                                                                                                                                                                                                                                                                                                                                                                                                                                                                                                                                                                                                                                                                                                                                                                                                                                                                                                                                                                                                                                                                                                                                                                          |
| <b>B.2. Probable</b>                                                                                                                                                                                                                                                                                                                                                                                                                                                                                                                                                                                                                                                                                                                                                                                                                                                                                                                                                                                                                                                                                                                                                                                                                                                                                                                                                                                                                                                    |
| B. 2.1. Absence of restrictive ventilatory defect BUT low MIP+SNIP                                                                                                                                                                                                                                                                                                                                                                                                                                                                                                                                                                                                                                                                                                                                                                                                                                                                                                                                                                                                                                                                                                                                                                                                                                                                                                                                                                                                      |
| B.2.2. Absence of spirometry AND MIP+SNIP ( <i>technical issue or patient's inability to perform</i> ) BUT hypercapnia OR diaphragm weakness considered certain and severe (see C)                                                                                                                                                                                                                                                                                                                                                                                                                                                                                                                                                                                                                                                                                                                                                                                                                                                                                                                                                                                                                                                                                                                                                                                                                                                                                      |
| <b>C. Diagnosis of diaphragm involvement</b>                                                                                                                                                                                                                                                                                                                                                                                                                                                                                                                                                                                                                                                                                                                                                                                                                                                                                                                                                                                                                                                                                                                                                                                                                                                                                                                                                                                                                            |
| <b>C.1. Certain</b>                                                                                                                                                                                                                                                                                                                                                                                                                                                                                                                                                                                                                                                                                                                                                                                                                                                                                                                                                                                                                                                                                                                                                                                                                                                                                                                                                                                                                                                     |
| C.1.1.at least two criteria among the following:<br><ul style="list-style-type: none"> <li>- abdominal paradox;</li> <li>- supine VC drop &gt;15%;</li> <li>- esophageal pressure twitch &lt; 11 cmH<sub>2</sub>O;</li> <li>- bilaterally micro-volted diaphragm M-waves;</li> <li>- reduced diaphragm excursion on ultrasound;</li> <li>- reduced diaphragm excursion on dynamic MRI;</li> <li>- clustered episodes of desaturation/hypoventilation on oximetry/hypercapnia.</li> </ul>                                                                                                                                                                                                                                                                                                                                                                                                                                                                                                                                                                                                                                                                                                                                                                                                                                                                                                                                                                                |
| C.1.2. complete diaphragm paralysis on diaphragm ultrasound or dynamic MRI                                                                                                                                                                                                                                                                                                                                                                                                                                                                                                                                                                                                                                                                                                                                                                                                                                                                                                                                                                                                                                                                                                                                                                                                                                                                                                                                                                                              |
| C.1.3. diaphragm myositis at autopsy                                                                                                                                                                                                                                                                                                                                                                                                                                                                                                                                                                                                                                                                                                                                                                                                                                                                                                                                                                                                                                                                                                                                                                                                                                                                                                                                                                                                                                    |
| <b>C.2. Probable</b>                                                                                                                                                                                                                                                                                                                                                                                                                                                                                                                                                                                                                                                                                                                                                                                                                                                                                                                                                                                                                                                                                                                                                                                                                                                                                                                                                                                                                                                    |
| C2.1. Respiratory muscle weakness AND one of the criteria listed in C1                                                                                                                                                                                                                                                                                                                                                                                                                                                                                                                                                                                                                                                                                                                                                                                                                                                                                                                                                                                                                                                                                                                                                                                                                                                                                                                                                                                                  |
| C2.2. Respiratory muscle weakness BUT none of the above.                                                                                                                                                                                                                                                                                                                                                                                                                                                                                                                                                                                                                                                                                                                                                                                                                                                                                                                                                                                                                                                                                                                                                                                                                                                                                                                                                                                                                |

**Abbreviations:** MIP: maximal inspiratory pressure ; NPV: normal predicted value; PFT: pulmonary function tests; SNIP: sniff nasal inspiratory pressure; VC: vital capacity

## REFERENCES

1. Rice BL, Ashton RW, Wang XF, Shook SJ, Mireles-Cabodevila E, Aboussouan LS. Modeling of Lung Function Recovery in Neuralgic Amyotrophy With Diaphragm Impairment. *Respir Care* **2017**;62(10):1269-76 doi 10.4187/respcare.05568.
2. Laveneziana P, Albuquerque A, Aliverti A, Babb T, Barreiro E, Dres M, *et al.* ERS statement on respiratory muscle testing at rest and during exercise. *Eur Respir J* **2019**;53(6) doi 10.1183/13993003.01214-2018.
